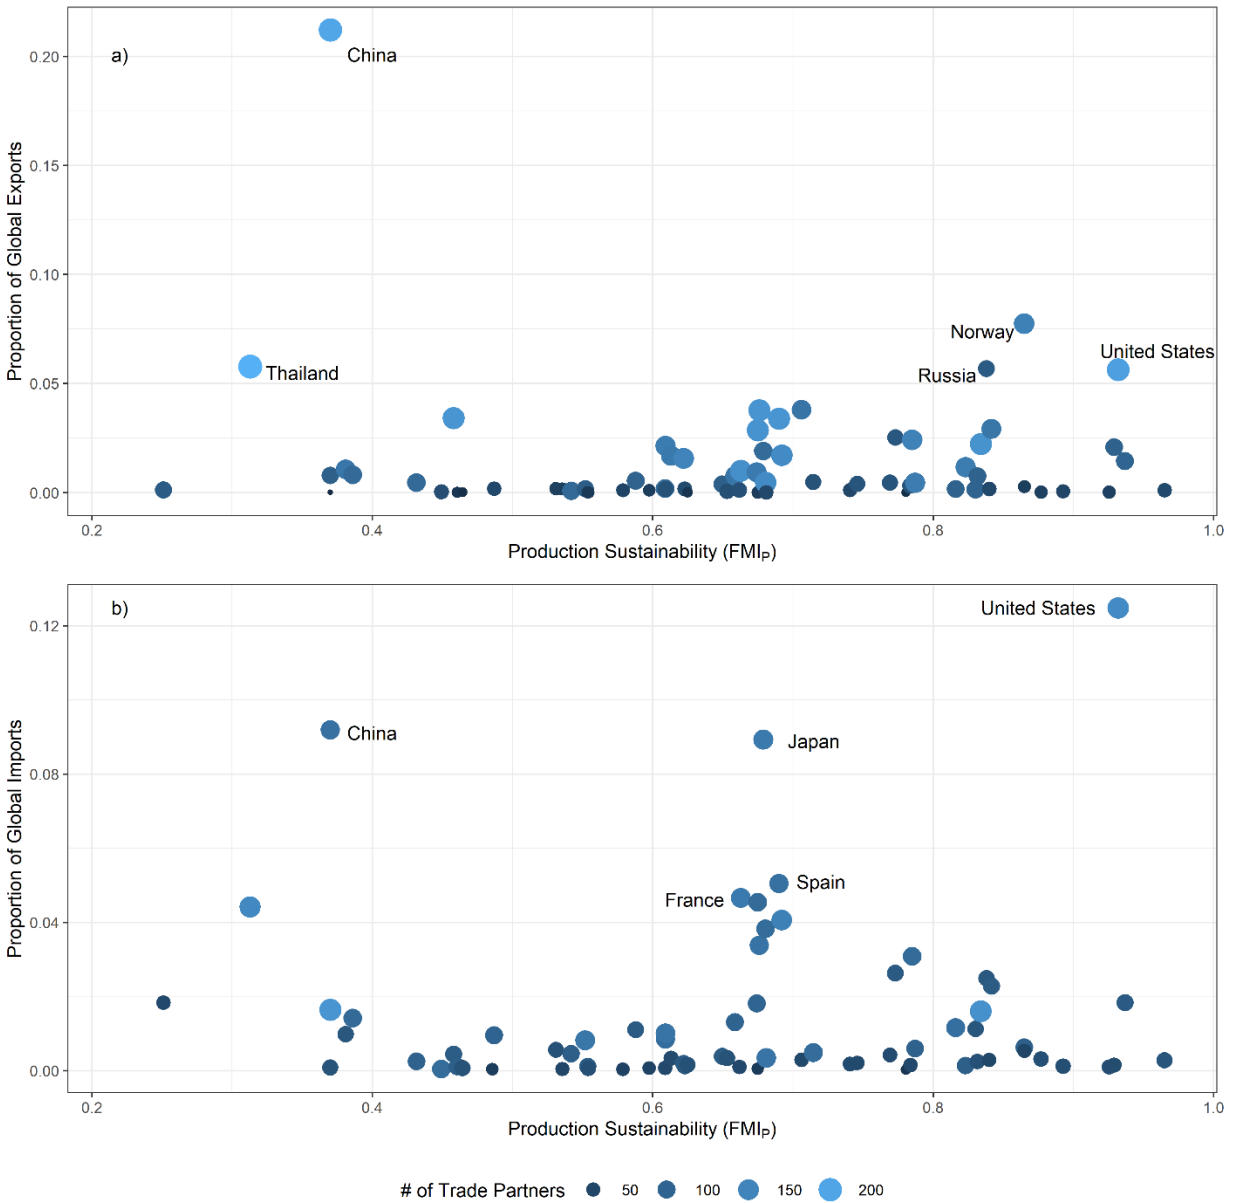

**Fig S4. Aquaculture Exclusion Analysis: The proportion of global exports (a) and imports (b) from 2012-2017 for each country analyzed arranged by FMI<sub>p</sub>.** The size and color of the points shows the number of trade partners for each country (note difference in scale of y-axis). The top five exporters and importers are labeled in each panel.
